# Supplementary material for: Ultrasensitive detection of the reduced form of nicotinamide adenine dinucleotide based on carbon nanotube field effect transistor
Source: Royal Society of Chemistry journal article supplement (doi:10.1039/c2an16253a), 2012-01-01

Title:

## Ultrasensitive detection for reduced form of nicotinamide adenine dinucleotide based on carbon nanotube field effect transistor

Manuscript ID: AN-ART-12-2011-016253

\*\*\*\*\*

### Supplementary Material

#### Results and discussion

##### 3. Examination and optimization of CNTFET modification

**Figure S-1** Drain current responses of the CNT-FET following 5.0  $\mu\text{l}$  Tris buffer injection with different pH values.

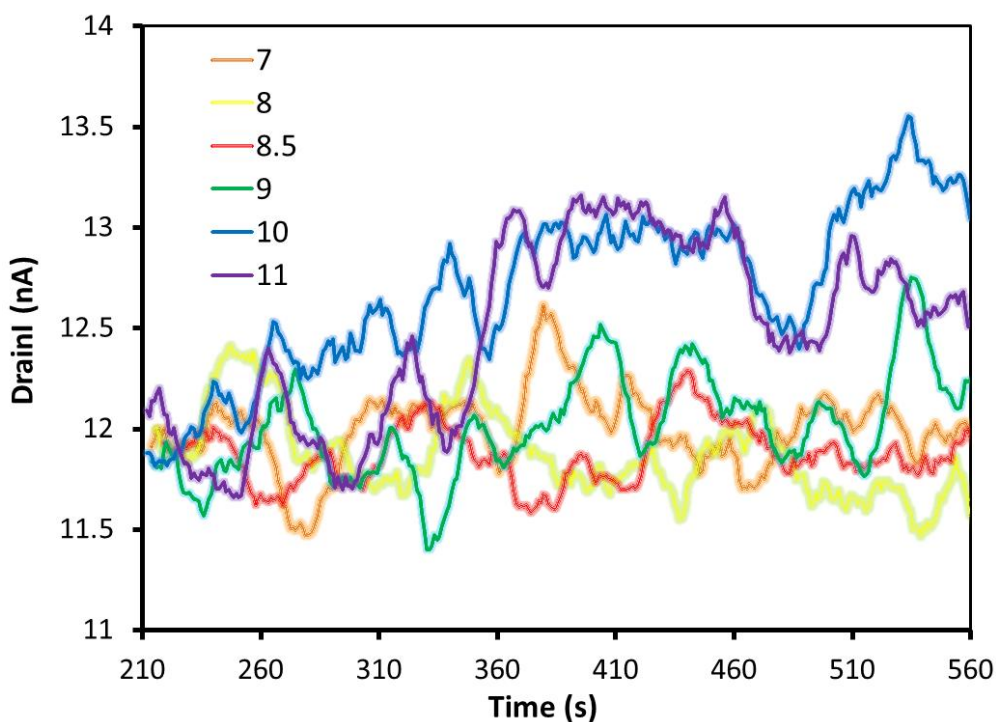

**Figure S-2** Cyclic voltammograms of mPMS-CNT in Tris buffer (0.01 M, pH 8.0) by electrode with/without polymer. Scan rate was  $4 \text{ mV s}^{-1}$ .

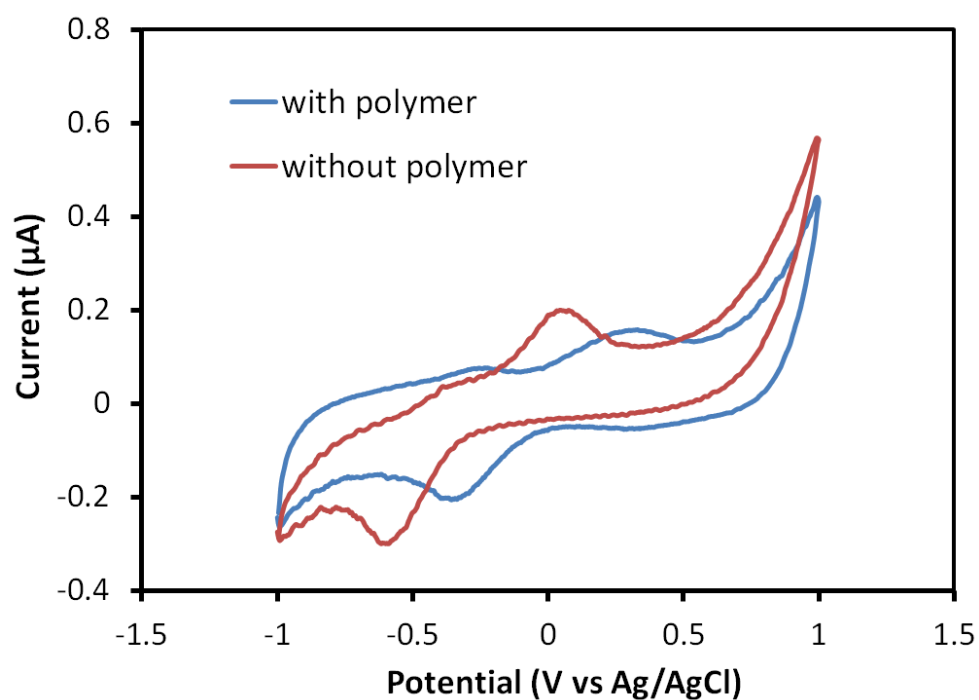

## Results and discussion

### 4. NADH detection using CNTFET treated by mPMS

**Figure S-3** Electrical responses of the CNT-FET following NADH injection at different concentrations measured by semiconductor characterization system. A source-drain (SD) bias of 50 mV was maintained throughout the electrical measurements for ~1000 seconds. The control indicates electrical conductance where only Tris buffer (0.01 M, pH 8.0) was introduced into the chamber.

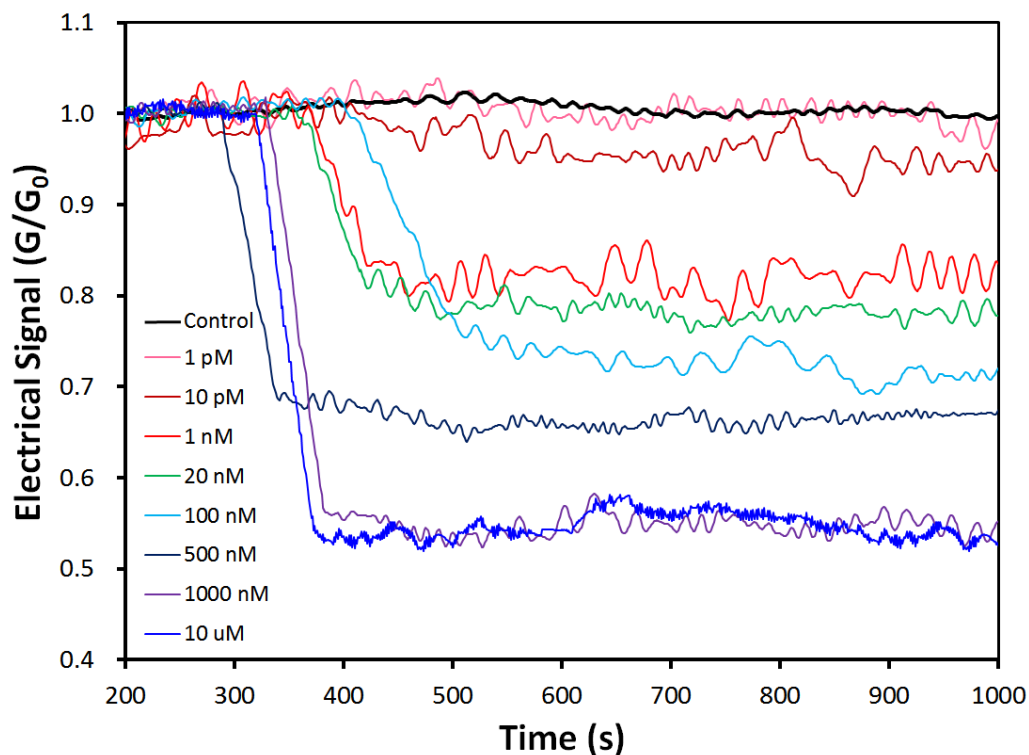

Supplement: c2an16253a.pdf [file c2an16253a.pdf]
